# Supplementary material for: DH2 regulates the development of lateral organs in rice
Source: Research Square preprint supplement (doi:10.21203/rs.3.rs-5016600/v1), 2024-10-03
Supplement: Supplementary file 1 [file 94fc366a0f2d0822690ac122.xlsx]

## Sheet: Sheet1
Primer name	Sequence (from 5' to 3')	Purpose
ACTIN-F	GACCCAGATCATGTTTGAGACCT	OsActin1 qRT-PCR
ACTIN-R	CAGTGTGGCTGACACCATCAC
tasiR-ARF-qF	GGACCTTCTTGACCTTGCAA	tasiR-ARF qRT-PCR
tasiR-ARF-qR	GTGCAGGGTCCGAGGT
AGO7-qF	GAAGTTATGTGGTGAGGAC	OsAGO7 qRT-PCR
AGO7-qR	TGGAGGTAATCTTGTGGAA
OsARF2-qF	GGCGATGAAGTGGATTGTG	OsARF2 qRT-PCR
OsARF2-qR	TATCAACGACCCTGCCAAC
OsARF3-qF	GCGGAGGGCGAGGTATTTG	OsARF3 qRT-PCR
OsARF3-qR	AGCAGCCCGACGAGGAACAG
OsARF4-qF	GAGCCCTTCAGAGTTCATT	OsARF4 qRT-PCR
OsARF4-qR	GTGCCTCTTCTCCTTCAAA
OsARF14-qF	CCCTCGTCGGTTCTGATGT	OsARF14 qRT-PCR
OsARF14-qR	TGATTTCGCTCGGCGTTTG
OsARF15-qF	GGAGGTTCCGCCATATTTA	OsARF15 qRT-PCR
OsARF15-qR	CACTTTCTGTAGCCACTGC
U6-qF	GGAACGATACAGAGAAGATTAGC	U6 qRT-PCR
U6-qR	TGGAACGCTTCACGAATTTGCG
OsARF2-ish-F1	CTGCCGCAAGCATCCTCTC	Primers used for OsARF2 in situ hydridization antisense probe amplification
OsARF2-ish-sp6-R1	AGATTTAGGTGACACTATAGAACAACGACCCTGCCAACAACA
OsARF3-ish-F1	CCCTGTCAACTGTGCCACCTT	Primers used for OsARF3 in situ hydridization antisense probe amplification
OsARF3-ish-sp6-R1	AGATTTAGGTGACACTATAGAA GGGCATGAAGAGCACCAGGC
OsARF4-ish-F1	GCAAGACTCAGGTTGCTTCGAC	Primers used for OsARF4 in situ hydridization antisense probe amplification
OsARF4-ish-sp6-R1	AGATTTAGGTGACACTATAGAA TCTGATTTGTTGGGCATCGG
OsARF14--ish-F1	TCGTCAAAGGTATCTTCTCCCTCG	Primers used for OsARF14 in situ hydridization antisense probe amplification
OsARF14-ish-sp6-R1	AGATTTAGGTGACACTATAGAA GCAGCACACAGGGCATGAAGA
OsARF15--ish-F1	ACAACTTCATGGCCGTGCTG	Primers used for OsARF15in situ hydridization antisense probe amplification
OsARF15-ish-sp6-R1	AGATTTAGGTGACACTATAGAA TAGCACAACTATTGCCCAGGG
